# Supplementary material for: Hominin occupation of the Chinese Loess Plateau since about 2.1 million years ago
Source: Springer Nature journal article supplement (doi:10.1038/s41586-018-0299-4), 2018-07-01
Supplement: 41586_2018_299_MOESM1_ESM.pdf [file 41586_2018_299_MOESM1_ESM.pdf]

In the format provided by the authors and unedited.

# Hominin occupation of the Chinese Loess Plateau since about 2.1 million years ago

Zhaoyu Zhu<sup>1,2\*</sup>, Robin Dennell<sup>3\*</sup>, Weiwen Huang<sup>2,4</sup>, Yi Wu<sup>5</sup>, Shifan Qiu<sup>6</sup>, Shixia Yang<sup>4,7</sup>, Zhiguo Rao<sup>8</sup>, Yamei Hou<sup>2,4</sup>, Jiubing Xie<sup>9</sup>, Jiangwei Han<sup>10</sup> & Tingping Ouyang<sup>1,11</sup>

---

<sup>1</sup>Key Laboratory of Ocean and Marginal Sea Geology, Guangzhou Institute of Geochemistry, Chinese Academy of Sciences, Guangzhou, China. <sup>2</sup>State Key Laboratory of Loess and Quaternary Geology, Institute of Earth Environment, Chinese Academy of Sciences, Xi'an, China. <sup>3</sup>Department of Archaeology, University of Exeter, Exeter, UK. <sup>4</sup>Key Laboratory of Vertebrate Evolution and Human Origins, Institute of Vertebrate Paleontology and Paleoanthropology, Chinese Academy of Sciences, Beijing, China. <sup>5</sup>Key Laboratory of Ocean and Marginal Sea Geology, South China Sea Institute of Oceanology, Chinese Academy of Sciences, Guangzhou, China. <sup>6</sup>School of Geography and Environmental Engineering, Gannan Normal University, Ganzhou, China. <sup>7</sup>State Key Laboratory of Lithospheric Evolution, Institute of Geology and Geophysics, Chinese Academy of Sciences, Beijing, China. <sup>8</sup>College of Resources and Environmental Sciences, Hunan Normal University, Changsha, China. <sup>9</sup>Environmental Supervision Detachment of Nanning, Nanning, China. <sup>10</sup>Henan Institute of Geological Survey, Zhengzhou, China. <sup>11</sup>School of Geography, South China Normal University, Guangzhou, China. \*e-mail: zhuzy@gig.ac.cn; r.w.dennell@exeter.ac.uk

# Supplementary Information

## I. The loess-palaeosol timescale

### (1) The loess-palaeosol timescale

The Chinese loess-palaeosol sequence is the longest, most continuous, and detailed terrestrial Quaternary sequence in the world. Research over the last 30 years has shown that palaeomagnetic dating is the most appropriate method for dating long sections of loess and palaeosols from the last ~2.6 Ma. Based on palaeomagnetic dating and astronomical tuning methods, the age of each unit in the Chinese Loess Plateau is given below in SI Table 1<sup>7, 10, 14</sup>. Recent research indicates that although the first-order chronological framework for Chinese loess sequences has been established, there still remain issues concerning age determination of the loess-palaeosol unit in which a given geomagnetic reversal is recorded<sup>19</sup>. Time delays of geomagnetic polarity reversals in Chinese Quaternary loess are estimated to be ca 10 to 30 kyr<sup>20</sup>. Because of this uncertainty, we cite ages of each layer to only two decimal places.

**SI Table 1.** The loess-palaeosol timescale according to Ding *et al.* (Chiloparts)<sup>10</sup> and Heslop *et al.*<sup>14</sup>. The Wucheng, Lishi, and Malan Formations were proposed by Liu *et al.*<sup>7</sup> in their investigations of the Luochuan sequence.

| Loess formation                  | Palaeosol -loess unit | Age (ka BP)        |                      | Loess formation         | Palaeosol -loess unit | Age (ka BP)        |                      |
|----------------------------------|-----------------------|--------------------|----------------------|-------------------------|-----------------------|--------------------|----------------------|
|                                  |                       | Ding <i>et al.</i> | Heslop <i>et al.</i> |                         |                       | Ding <i>et al.</i> | Heslop <i>et al.</i> |
| <i>Malan</i><br>Loess            | S0                    | 0-11               |                      | <i>Wucheng</i><br>Loess | S15                   | 1,263-1,281        | 1,223-1,249          |
|                                  | L1                    | 11-73              |                      |                         | L16                   | 1,281-1,297        | 1,249-1,263          |
|                                  | S1                    | 73-128             | 79-126               |                         | S16                   | 1,297-1,318        | 1,263-1,296          |
|                                  | L2                    | 128-190            | 129-196              |                         | L17                   | 1,318-1,350        | 1,296-1,311          |
|                                  | S2-1                  | 190-219            | 196-226              |                         | S17                   | 1,350-1,365        | 1,311-1,363          |
|                                  | S2-2                  | 234-245            | 234-250              |                         | L18                   | 1,365-1,390        | 1,363-1,386          |
|                                  | L3                    | 245-307            | 250-290              |                         | S18                   | 1,390-1,411        | 1,386-1,405          |
| S3                               | 307-336               | 290-342            | L19                  |                         | 1,411-1,441           | 1,405-1,448        |                      |
| <i>Lishi</i><br>Loess<br>(upper) | L4                    | 336-360            | 342-386              |                         | S19                   | 1,441-1,453        | 1,448-1,458          |
|                                  | S4                    | 360-412            | 386-417              |                         | L20                   | 1,453-1,467        | 1,458-1,470          |
|                                  | L5                    | 412-479            | 417-503              |                         | S20                   | 1,467-1,492        | 1,470-1,484          |
|                                  | S5-1                  | 479-531            | 503-556              |                         | L21                   | 1,492-1,505        | 1,484-1,514          |
|                                  | S5-2                  | 549-579            | 568-575              |                         | S21                   | 1,505-1,525        | 1,514-1,530          |
|                                  | S5-3                  | 585-621            | 581-625              |                         | L22                   | 1,525-1,540        | 1,530-1,541          |
|                                  | L6                    | 621-684            | 625-693              | S22                     | 1,540-1,571           | 1,541-1,573        |                      |
|                                  | S6                    | 684-710            | 693-713              | L23                     | 1,571-1,588           | 1,573-1,600        |                      |
|                                  | L7                    | 710-760            | 713-765              | S23                     | 1,588-1,648           | 1,600-1,614        |                      |

|                                           |      |             |             |  |     |             |             |
|-------------------------------------------|------|-------------|-------------|--|-----|-------------|-------------|
|                                           | S7   | 760-787     | 765-788     |  | L24 | 1,648-1,711 | 1,614-1,767 |
|                                           | L8   | 787-819     | 788-807     |  | S24 | 1,711-1,734 | 1,767-1,774 |
|                                           | S8   | 819-865     | 807-865     |  | L25 | 1,734-1,801 | 1,774-1,807 |
|                                           | L9   | 865-943     | 865-952     |  | S25 | 1,801-1,828 | 1,807-1,820 |
|                                           | S9-1 | 943-958     | 952-964     |  | L26 | 1,828-1,891 | 1,820-1,885 |
|                                           | S9-2 | 971-989     | 977-984     |  | S26 | 1,891-1,946 | 1,885-1,949 |
|                                           | L10  | 989-1,018   | 984-1,012   |  | L27 | 1,946-2,089 | 1,949-2,095 |
|                                           | S10  | 1,018-1,049 | 1,012-1,034 |  | S27 | 2,089-2,119 | 2,095-2,125 |
|                                           | L11  | 1,049-1,061 | 1,034-1,044 |  | L28 | 2,119-2,130 | 2,125-2,135 |
|                                           | S11  | 1,061-1,076 | 1,044-1,055 |  | S28 | 2,130-2,146 | 2,135-2,147 |
| <b><i>Lishi</i><br/>Loess<br/>(lower)</b> | L12  | 1,076-1,102 | 1,055-1,071 |  | L29 | 2,146-2,177 | 2,147-2,172 |
|                                           | S12  | 1,102-1,120 | 1,071-1,080 |  | S29 | 2,177-2,217 | 2,172-2,204 |
|                                           | L13  | 1,120-1,158 | 1,080-1,162 |  | L30 | 2,217-2,249 | 2,204-2,230 |
|                                           | S13  | 1,158-1,208 | 1,162-1,175 |  | S30 | 2,249-2,260 | 2,230-2,240 |
|                                           | L14  | 1,208-1,220 | 1,175-1,182 |  | L31 | 2,260-2,271 | 2,240-2,341 |
|                                           | S14  | 1,220-1,240 | 1,182-1,190 |  | S31 | 2,271-2,307 | 2,341-2,369 |
|                                           | L15  | 1,240-1,263 | 1,190-1,223 |  | L32 | 2,307-2,493 | 2,369-2,540 |
|                                           |      |             |             |  | S32 | 2,493-2,547 | 2,540-2,596 |
|                                           |      |             |             |  | L33 | 2,547-2,600 | 2,596-2,600 |

## (2) Dating by sedimentation rates

i) As an independent check on the Chiloparts timescale, the age of the loess-palaeosol units in the Shangchen (SC) section was calculated from estimates of its sedimentation rate. Dating a sedimentary section by estimating its sedimentation rate is a valid method when there are control points of ages measured by an independent dating method.

ii) Three methods were used to determine sedimentation rate age (SRA) for the segment between S15 and L28: 1) the average sedimentation rate of the total section, 2) the average sedimentation rate of each segment based on the position and age of palaeomagnetic reversal boundaries, and 3) the average sedimentation rate of each segment above the base of the Olduvai Subchron, with the compaction rate added to the sedimentation rate calculation for the segment below the Olduvai base (see SI Tables 2 and 3). Compared with the Chiloparts<sup>10</sup> timescale, the poorest estimate is method 1), with a correlation coefficient of 0.969 and an average error of 10.19%. With this method, even the Olduvai Subchron would be located in S23 instead of the lower part of L25 to the base of S26<sup>7</sup>. For Method 2), the correlation coefficient is 0.988 and the average error is only 2.16%. With this method, the oldest layer with artefacts was above the Réunion Excursion, which was situated within L28. The correlation coefficient of method 3) is 0.989 and the average error is 2.23%. Although the age (2.102 Ma) of the base of S27 estimated by this method is similar to that (2.119 Ma)

of the Chiloparts timescale, the age of oldest layer with artefacts is 2.153 Ma, which is older than the age of the Réunion Excursion (2.128-2.148 Ma). Overall, Method 2) appears the most applicable.

If we use Method 2), the age of the oldest stone artefact horizon between S27 and L28 (see Extended Data Figures 8-9), which is situated 3.00-3.95 m below the base of the Olduvai Subchron and 1.64-0.69 m above the top of the Réunion Excursion, is ca 2.06-2.10 Ma. That is similar to the age estimated by Chiloparts, i.e. 2.09-2.12 Ma, but there is a time delay of ~20 or 30 ka. Sedimentation rate is also affected by the compaction rate of sediments, as discussed below.

**SI Table 2.** Calculation of sedimentation and compaction rates of layers below L15 in the Shangchen section (SC)

| Reversal boundary | Age (Ma) | Polarity Chron       | Depth (m)          | Thickness (m) |       | Sedimentation rate (m/Ma) |               | Compaction rate |               |
|-------------------|----------|----------------------|--------------------|---------------|-------|---------------------------|---------------|-----------------|---------------|
|                   |          |                      |                    |               |       | segments                  | total average | segments        | total average |
| Brunhes base      | 0.781    | C1r.1r (Matuyama)    | 9.71               | 13.79         | 64.34 | B-J                       | 66.618        |                 |               |
| Jaramillo top     | 0.988    |                      | C1r.1n (Jaramillo) |               |       | 23.50                     | J             | 40.476          |               |
| Jaramillo base    | 1.072    | C1r.2r-C1r.2n-C1r.3r | 26.90              | 36.04         | 64.34 | J-O                       | 51.048        | J/B-J           | 0.608         |
| Olduvai top       | 1.778    |                      | C2n (Olduvai)      |               |       | 62.94                     | O             | 32.934          | J-O/J         |
| Olduvai base      | 1.945    | C2r.1r               | 68.44              | 4.64          | 64.34 | O-R                       | 25.355        | O/J-O           | 0.645         |
| Réunion top       | 2.128    |                      | C2r.1n (Réunion)   |               |       | 73.08                     | R             | 16.500          | O-R           |
| Réunion base      | 2.148    | C2r.2r               | 73.41              | 0.64          | 64.34 | R- base <sup>1)</sup>     | 25.355        | R               | 0.651         |
| SC section base   | 2.166    |                      | 74.05              |               |       | R- base <sup>2)</sup>     | 0.770         |                 |               |

1) and 2) Because the Réunion Excursion was very short-lived the recorded strata thickness may be incomplete and its compaction rate could be abnormal. Therefore, the sedimentation rate and the compaction rate of the layers below the top of Réunion Excursion are those used between the Olduvai Subchron and Réunion Excursion.

**SI Table 3.** Sedimentation rate age of main layers below L15 of the Shangchen section (SC) and correlation with Chiloparts

| Loess-palaeosol sequence                                                            | Depth (m)  |             | (1) By total section |              | (2) By segments of section |              | (3) By segments + compaction rate <sup>1)</sup> |              | Chiloparts (Ma) (by Ding <i>et al.</i> , 2002) <sup>10</sup> |                | Loess-palaeosol layer |
|-------------------------------------------------------------------------------------|------------|-------------|----------------------|--------------|----------------------------|--------------|-------------------------------------------------|--------------|--------------------------------------------------------------|----------------|-----------------------|
|                                                                                     | SC Top (m) | SC Base (m) | SC Top (Ma)          | SC Base (Ma) | SC Top (Ma)                | SC Base (Ma) | SC Top (Ma)                                     | SC Base (Ma) | Ding Top (Ma)                                                | Ding Base (Ma) |                       |
| Top, L5 mid                                                                         | 0.00       |             | 0.569                |              | 0.574                      |              | 0.574                                           |              | 0.447                                                        |                | Top, L5 mid           |
| S15                                                                                 | 38.20      | 40.50       | 1.403                | 1.454        | 1.293                      | 1.338        | 1.293                                           | 1.338        | 1.263                                                        | 1.281          | S15                   |
| S16                                                                                 | 41.30      | 42.40       | 1.471                | 1.495        | 1.354                      | 1.376        | 1.354                                           | 1.376        | 1.297                                                        | 1.318          | S16                   |
| L17                                                                                 | 42.40      | 43.40       | 1.495                | 1.517        | 1.376                      | 1.395        | 1.376                                           | 1.395        | 1.318                                                        | 1.350          | L17                   |
| S18                                                                                 | 45.20      | 46.00       | 1.556                | 1.574        | 1.430                      | 1.446        | 1.430                                           | 1.446        | 1.390                                                        | 1.411          | S18                   |
| S19                                                                                 | 47.00      | 48.40       | 1.596                | 1.626        | 1.466                      | 1.493        | 1.466                                           | 1.493        | 1.441                                                        | 1.453          | S19                   |
| S20                                                                                 | 49.80      | 50.80       | 1.657                | 1.679        | 1.521                      | 1.540        | 1.521                                           | 1.540        | 1.467                                                        | 1.492          | S20                   |
| L21                                                                                 | 50.80      | 51.70       | 1.679                | 1.698        | 1.540                      | 1.558        | 1.540                                           | 1.558        | 1.492                                                        | 1.505          | L21                   |
| S21                                                                                 | 51.70      | 52.70       | 1.698                | 1.720        | 1.558                      | 1.577        | 1.558                                           | 1.577        | 1.505                                                        | 1.525          | S21                   |
| L22                                                                                 | 52.70      | 53.70       | 1.720                | 1.742        | 1.577                      | 1.597        | 1.577                                           | 1.597        | 1.525                                                        | 1.540          | L22                   |
| S22                                                                                 | 53.70      | 55.00       | 1.742                | 1.771        | 1.597                      | 1.622        | 1.597                                           | 1.622        | 1.540                                                        | 1.571          | S22                   |
| S23                                                                                 | 56.70      | 57.90       | 1.808                | 1.834        | 1.656                      | 1.679        | 1.656                                           | 1.679        | 1.588                                                        | 1.648          | S23                   |
| S24                                                                                 | 59.90      | 61.60       | 1.878                | 1.915        | 1.718                      | 1.752        | 1.718                                           | 1.752        | 1.711                                                        | 1.734          | S24                   |
| L25                                                                                 | 61.60      | 65.50       | 1.915                | 2.000        | 1.737                      | 1.856        | 1.737                                           | 1.856        | 1.734                                                        | 1.801          | L25                   |
| S26                                                                                 | 68.10      | 69.30       | 2.057                | 2.083        | 1.935                      | 1.971        | 1.935                                           | 1.989        | 1.891                                                        | 1.946          | S26                   |
| L27                                                                                 | 69.30      | 70.16       | 2.083                | 2.102        | 1.979                      | 2.013        | 1.989                                           | 2.033        | 1.946                                                        | 2.089          | L27                   |
| S27                                                                                 | 70.16      | 71.50       | 2.102                | 2.131        | 2.013                      | 2.066        | 2.033                                           | 2.102        | 2.089                                                        | 2.119          | S27                   |
| L28 ~SC base                                                                        | 71.50      | 74.05       | 2.131                | 2.187        | 2.066                      | 2.166        | 2.102                                           | 2.232        | 2.119                                                        | 2.130          | L28                   |
| the oldest artefact layer <sup>2)</sup>                                             | 71.44      | 72.39       | <b>2.130</b>         | <b>2.153</b> | <b>2.063</b>               | <b>2.101</b> | <b>2.099</b>                                    | <b>2.153</b> |                                                              |                |                       |
| coefficients of correlation ( $r^2$ ) between sedimentation rate age and Chiloparts |            |             | 0.9657               | 0.9715       | 0.9872                     | 0.9888       | 0.9906                                          | 0.9864       |                                                              |                |                       |
| error (%) of sedimentation rate age vs. Chiloparts age                              |            |             | average              | 0.9686       | average                    | 0.9880       | average                                         | 0.9885       |                                                              |                |                       |
|                                                                                     |            |             | 10.35                | 10.03        | 2.12                       | 2.20         | 2.31                                            | 2.59         |                                                              |                |                       |
|                                                                                     |            |             | average              | 10.19        | average                    | 2.16         | average                                         | 2.45         |                                                              |                |                       |

Notes: 1) compaction rate is only used for horizons below the Olduvai Subchron; and 2) the oldest artefact layer within the lower S27 and the upper L28 is situated 3.00-3.95 m below the base of the Olduvai Subchron and 1.64-0.69 m above the top of the Réunion Excursion.

iii) Estimates of layer age based on sedimentation rate are likely to undershoot the true age of the lowest layers because loess and palaeosol of different ages have different porosity (density) and compaction rates. This can be seen by comparing the length of time taken for loess/palaeosols of different ages to disintegrate in water (SI Table 4).

**SI Table 4. Disintegration rates (in seconds) of loess and palaeosol samples of different ages from the Shangchen section when soaked in water.**

| Sampling layer | Lithology | Average age (ka BP) | Start of disintegration (s) | Start of collapse (s) | Complete Disintegration (s) |
|----------------|-----------|---------------------|-----------------------------|-----------------------|-----------------------------|
| L8             | Loess     | 800                 | 10                          | 19                    | 60                          |
| L15            | Loess     | 1,250               | 24                          | 50                    | 90                          |
| S27            | Palaeosol | 2,100               | 45                          | 300                   | 360                         |
| S27            | Palaeosol | 2,100               | 50                          | 240                   | 330                         |

When loess and palaeosol samples are soaked in water, they quickly disaggregate completely, which indicates that diagenesis has not caused cementation in the loess and palaeosol sequence. Such sediments disintegrate, collapse, and slide to the bottom of gullies soon after being soaked by surface water and groundwater. Therefore, no loose slope wash of loess occurs in steep loess sections. Generally, loose loess slope wash can only remain on gentle slopes or at the bottom of gullies, and its thickness on gentle slopes is small.

Loess and palaeosols of different ages differ greatly in their decomposition and collapse rates, which indicates that they have different porosity (density) and compaction rates. The older the underlying loess and palaeosol, the greater thickness and pressure of the overlying younger loess and palaeosol, which leads to a decreased porosity and increased density, and to compaction in older loess, which makes it more difficult for older loess to disintegrate and collapse. This indicates that the loess identified as S27 and associated with the oldest stone artefacts is old loess. However, the present thickness of old loess does not represent its original thickness at deposition, but probably much less due to compaction. Thus, compaction rates must be considered when the lowermost sediments of the Shangchen section are dated using sedimentation rates. Therefore, it is more appropriate to take compaction rate into the account when calculating the average

sedimentation rate, or to estimate it using a palaeomagnetic age that is the nearest to the loess horizon.

As shown in SI Table 5 below, the older the loess, the higher the dry unit weight, the lower the void ratio, and the smaller the coefficient of compressibility, which is consistent with the experimental results presented above, which indicates again that we must consider the compaction rate of sediments when we estimate sedimentation rate and sedimentary age from the present sedimentary thickness.

**SI Table 5. Average value of main physical parameters of loess and palaeosol samples of different ages from the Chinese Loess Plateau<sup>7, 33, 34</sup>.**

| Geological era of loess sample          | Depth (m) of sampling | Dry unit weight (g/cm <sup>3</sup> ) | Void ratio (%) | Coefficient of compressibility (cm <sup>2</sup> /kg) | Reference                    |
|-----------------------------------------|-----------------------|--------------------------------------|----------------|------------------------------------------------------|------------------------------|
| Q <sub>3</sub> (Late Quaternary)        | —                     | 1.29                                 | 1.10           | 0.038                                                | 7. Liu <i>et al.</i> , 1985  |
| Q <sub>1-2</sub> (Mid-early Quaternary) | —                     | 1.41                                 | 0.85           | 0.008                                                |                              |
| Q <sub>3</sub> (Late Quaternary)        | 3.00                  | 1.23                                 | 1.22           | 0.056                                                | 33. Liu <i>et al.</i> , 1966 |
| Q <sub>2</sub> (Mid Quaternary)         | 6.00                  | 1.52                                 | 0.79           | 0.003                                                |                              |
| Q <sub>1-2</sub> (Mid-early Quaternary) | 10.00                 | 1.66                                 | 0.64           | 0.001                                                |                              |
| Q <sub>3</sub> (Late Quaternary)        | —                     | 1.33                                 | —              | —                                                    | 34. Zhu & Ding, 1994         |
| Q <sub>2</sub> (Mid Quaternary)         | —                     | 1.62                                 | —              | —                                                    |                              |
| Q <sub>1</sub> (Early Quaternary)       | —                     | 1.83                                 | —              | —                                                    |                              |

In conclusion, we use the chronological framework of Chiloparts<sup>10</sup> for dating the loess-palaeosol sequence and stone artefacts at the Shangchen locality because it is internationally recognized as a timescale for the Chinese Quaternary by international organizations on Quaternary stratigraphy and geochronology (see e.g. <http://www.quaternary.stratigraphy.org.uk/charts/> (2016)<sup>18</sup>. With the Chiloparts timescale, the oldest stone artefact horizon (the upper of L28) is ~2.12 Ma, which is slightly younger than the Réunion Excursion (2.13-2.15 Ma), and is entirely consistent with the facts of our palaeomagnetic measurements. Therefore, it is reasonable that the oldest stone artefacts at the Shangchen locality are dated to ~2.12 Ma.

## **II. Main methods and results**

### **(1) Grain size**

Grain size was measured with a Malvern Mastersizer-2000 laser diffraction particle size analyzer. Grain size distributions for loess and palaeosol samples from the Shangchen (SC) section are shown in Extended Data Figure 1, and are similar to those of the loess-palaeosol sequence at Lingtai which is located south of the Xifeng section, and is one of the standard sections in east Gansu Province<sup>31</sup>.

### **(2) Mineralogy**

The bulk mineralogy and elemental composition of loess and palaeosol samples from SC were analyzed using general chemical and XRD (X-ray diffraction) methods at the Guangzhou Institute of Geochemistry, CAS. Loess is characterized by higher concentrations of montmorillonite and calcite than palaeosols, but concentrations of illite and kaolinite are higher in palaeosols. These characteristics are the same as for the Luochuan loess section<sup>7</sup>.

### **(3) Geochemistry**

In Extended Data Figure 1 we compare major elements between the SC loess sections (average of 26 samples from this paper) and Luochuan (average of 36 samples, adapted from Liu *et al.*<sup>7</sup>) which have high geochemical similarities. The characteristics of partition mode of Rare Earth elements in loess and palaeosol samples from SC indicate they are the same as those from Luochuan.

The above three pieces of evidence indicate that the SC loess-palaeosol sequence has the same constituent and sedimentation source as other standard loess-palaeosol sequences from the Chinese Loess Plateau, and also indicate that the SC loess and palaeosol are aeolian sediments that are suitable for palaeomagnetic dating.

### **(4) Palaeomagnetism**

#### **(i) Sampling**

The Shangchen section is developed continuously along the same gully and hill. We divided the sampling into five subsections (i.e. offset sections), including four Subsections (I, II, III, and IV) along the same gully and one Subsection (KW) at the foot of the hill. Marker layers, such as L9, L15, and L25 were used to link these sub-sections (see Figure 2 in main text and Extended Data Figures 4 and 5 for details). After removing weathered surface sediments and cleaning sections back to undisturbed loess, discrete powder samples were collected at a stratigraphic sampling interval of 5-10 cm. Oriented block hand-samples were collected at an average sampling interval of



ca 10 cm for the whole section. Sampling intervals are not constant in each segment. Sampling intervals and their percentages are 1-5 cm (32.2%), 6-10 cm (47.8%), 11-20 cm (11.2%), and 25-130 (8.8%). Larger sampling intervals (ranging from 25 to 130 cm) were used in the upper section because this segment is young and is constrained by several marker layers, such as S5, L9, and L15, and some segments contain carbonate nodule layers that cannot be used for palaeomagnetic dating. Each block hand-sample was cut into  $2 \times 2 \times 2$  cm cubic specimens in the laboratory. A total of 722 specimens were subjected to palaeomagnetic measurements. Other samples collected from some short parallel sections were measured across key polarity reversals such as the Matuyama-Brunhes boundary. These results from parallel sections are the same as those in the main section, and hence we have not presented extra data on magnetic susceptibility and polarity from them.

### **(ii) Rock magnetism**

Powder samples were air-dried and were later ground in the laboratory to measure magnetic parameters. Magnetic susceptibility was measured using a Bartington Instruments MS2 susceptometer at frequencies of 0.47 and 4.7 kHz, respectively. Magnetic susceptibility of loess in north China is usually accepted as a palaeoclimate proxy of the East Asian summer monsoon<sup>7, 10, 31, 35</sup>. The magnetic susceptibility profile generally has high and low values in interglacial palaeosol and glacial loess horizons, respectively. Thus, palaeoclimate boundaries determined from the magnetic susceptibility profile correlate well with field observations in most loess-palaeosol sequences.

Representative samples from several loess and palaeosol horizons were selected for thermomagnetic and hysteresis measurements. Thermomagnetic curves (M-T) and hysteresis loops were measured using a variable field transition balance (VFTB) at the Key Laboratory of Western Environmental Systems (MOE), Lanzhou University. All four representative samples undergo a clear drop in magnetisation at ca 580 °C (see Extended Data Figure 2a), which indicates that the major remanence carrier is magnetite in both the loess and palaeosol samples. The magnetisations of samples from L8, L15, and S26 decrease during heating between 580 °C and ~700 °C, which suggests the presence of hematite in the sediments. A slight hump at ca 200-300 °C in the heating runs is indicative of maghemite grains of pedogenic origin<sup>36, 37</sup>. Hysteresis loops (Extended Data Figure 2b) for the palaeosol samples are generally narrower than those of the loess samples, probably indicating the presence of more low-coercivity magnetic grains in the weathered soils. Hysteresis loops of the latter four samples exhibit clear evidence of wasp-waisted characteristics, which indicates contributions from both superparamagnetic grains and high-coercivity magnetic

minerals<sup>38, 39</sup>. These magnetic characteristics of loess/palaeosol samples from the Shangchen section are consistent with previous investigations of the Lantian loess-palaeosol<sup>3, 40</sup> and other classic loess-palaeosol sections from the Chinese Loess Plateau<sup>41-43</sup>.

Anisotropy of magnetic susceptibility (AMS) was measured using a MFK1-FA Kappabridge instrument with a magnetic field of 400 A/m and frequency of 976 Hz and precision of  $2 \times 10^{-8}$  SI at the Guangzhou Institute of Geochemistry, CAS. The AMS data were processed according to the method of Jelínek<sup>44</sup>. The AMS of an oriented sample can be described as a three-dimensional ellipsoid by using three orthogonal principal axes, i.e., the maximum, intermediate, and minimum principal axes ( $\kappa_{\max}$ ,  $\kappa_{\text{int}}$ ,  $\kappa_{\min}$ ). A total of 694 oriented specimens from the main section and some short parallel sections were used to detect possible disturbances of the sediment fabric. Most of the 694 specimens have a prevalent oblate magnetic fabric with foliation exceeding the lineation, with  $\kappa_{\max}$  inclinations lying near-horizontal, and with  $\kappa_{\min}$  inclinations mostly perpendicular (Extended Data Figure 2a). These results indicate a primary sedimentary fabric that remains undisturbed throughout the section. The rock magnetic data described here indicate that the samples from Shangchen are typical of Chinese loess-palaeosol sequences, which are suitable for palaeomagnetic dating.

### (iii) Magnetostratigraphy

Progressive thermal demagnetization was performed on oriented specimens. Most of the 722 specimens were heated from room temperature to 585°C, with 145 specimens up to higher temperatures and 40 up to 690°C. All remanence measurements were made using a 2 G-Enterprises three-axis cryogenic magnetometer (2G755R and 2G760 U-channel) in a magnetically shielded space at the Palaeomagnetism Laboratory, Institute of Geology and Geophysics, CAS, and at the palaeomagnetic laboratory at the South China Sea Institute of Oceanology, CAS. All results from each sampled unit and from the same oriented hand-sample or from nearby horizons are comparable. The ChRM component was determined using principal component analysis (PCA) calculated by a least-squares method<sup>45</sup>. We employ unanchored PCA fitting to process the demagnetization data<sup>46</sup>. The natural remanent magnetization (NRM) of specimens often consists of at least two magnetic components. The component isolated at <250 °C is often considered as a viscous remanent magnetization and can be easily eliminated. The stable ChRM component of most specimens can be isolated from 250 to 585 °C, except very few specimens from the bottom of the section, which were given a stable ChRM component above 585 °C. A few specimens that were thermally demagnetized up to 690 °C were characterized by a sub-stable component above 585 °C. However, no apparent difference was found between them and those from 250 to 585 °C. Specimens with a ChRM

maximum angular deviation (MAD) less than  $15^\circ$  ( $N = 694$ ,  $\sim 96.1\%$  of 722 specimens) were used to construct the palaeomagnetic stratigraphy (see data list in Source Data), while 28 specimens ( $\sim 3.9\%$  of 722 specimens) with greater MAD values were abandoned.

The ChRM directions yield a mean of  $D = 2.9^\circ$ ,  $I = 54.0^\circ$  ( $k = 14.96$ , and  $\alpha_{95} = 3.10$ ) for the 151 normal polarity specimens, and  $D = 182.0^\circ$ ,  $I = -52.1^\circ$  ( $k = 40.90$ , and  $\alpha_{95} = 1.00$ ) for the 543 reversed polarity specimens.  $D$ ,  $I$ ,  $k$ , and  $\alpha_{95}$  are the declination and inclination of the palaeomagnetic direction, precision parameter, and half angle of the 95% confidence cone of Fisher<sup>47</sup>, respectively. The reversal test was positive within an angular difference of  $2.00^\circ$  between the mean directions of each polarity, which is less than the critical angle of  $4.23^\circ$  at the 95% confidence level and thus passed an A-class reversal test<sup>48</sup>. Equal area projections for all specimen directions are shown in Extended Data Figure 2b. Orthogonal projections of demagnetization data for 15 representative specimens are shown in Extended Data Figure 3, among which (a), (b), (d), (e), (i), (k), (m), and (n) have normal polarity, and all the others have reversed polarity. There are almost no intermediate directions recorded in the polarity transition zones throughout the section. In Figure 3 of the main text, a vertical line at  $0^\circ$  is used to define the locations of reversal boundaries. A reversal is defined by at least three successive data points. In our magnetostratigraphy of the Shangchen section the Matuyama-Brunhes boundary ( $\sim 0.78$  Ma) is recorded in mid-lower S7, the Jaramillo Subchron (0.99-1.07 Ma) is recorded in units S10-S12, the Olduvai Subchron (1.78-1.95 Ma) is recorded in units L25-S26, and the Réunion Excursion (2.13-2.15 Ma) is recorded in unit L28. Future work is needed to demonstrate the existence of the Punaruu Excursion ( $\sim 1.12$  Ma) in the study area (see “e1” in Figure 3 of main text). One normal polarity data point, which occurs just below the Matuyama-Brunhes boundary, cannot be identified as an independent polarity event (see Figure 3 of main text).

Based on marker layers (including L9, L15, and L24-L25) and reversal boundaries of palaeomagnetic zones, the five subsections (I, II, III, IV, and KW) have been linked to establish the comprehensive main section with a timescale at the Shangchen locality (see Extended Data Figures 4, and 5 for the distribution and linking method of the subsections). This linking method is a well-established and effective approach to investigating offset sections<sup>29</sup>.

#### (iv) Magnetism as a check on the stratigraphic integrity of stone artefacts

An innovative aspect of the research programme was that the magnetic properties of loess and palaeosol samples were used to check that stone artefacts were in undisturbed loess/palaeosol

deposits and not in re-deposited sediments or slope wash. The underlying rationale is that in-situ loess/palaeosol and slope wash have completely different palaeomagnetic signatures.

In the field, bulk palaeomagnetic loess samples of slope wash were difficult to collect because of their loose structure mixed with weeds, roots and other debris. Most of them can only be sampled using small plastic boxes. However, original, in-situ loess and palaeosol can not only be cut out as intact palaeomagnetic samples (10 x 10 x 10 cm, or bigger) in the field but also can be subsampled to standard palaeomagnetic measurement samples (2 x 2 x 2 cm) in the laboratory.

The magnetic fabric of re-deposited slope deposits showed very disordered axial directions because of its modification by rolling, sliding and transporting. In contrast, the magnetic fabric of primary loess and palaeosol is indicative of the original polarity at the time of deposition.

The palaeomagnetic polarity and characteristic remanent magnetism of slope deposits are usually positive or disordered, or undetectable because most of them were formed in modern times after the inception of gully incision. However, the magnetic polarity and stable characteristic remanent magnetic direction of loess and palaeosol are detectable with only a very small error, because they represent the palaeomagnetic polarity at the time of deposition. Excellent negative palaeomagnetic polarity data were shown at several key horizons such as S22, S23, S24, S27 at the same level and above stone artefacts. Therefore, they are absolutely not slope deposits, and these artefacts are therefore definitely in undisturbed deposits.

### **III. Archaeological field procedures**

The Shangchen section is a homogenous aeolian loess (dust) profile (see Extended Data Figures 1 and 4), without coarse grains or stone inclusions, and without sediment elements from other modes of deposition, such as alluvial and diluvial deposits, or slope wash. The section is on the loess tableland, which sits above surrounding landforms. This is a stone-free landscape, and there is no natural background of gravel or stream deposits, and no clasts occur at the base of gullies. The nearest mountains are around 5-21 km away.

Most of the examined sections have slopes of between 50° and 80°. Steeper intervals are inaccessible unless they occur at the base of a section or adjacent to a road or path. In some cases, foot- and hand- holds were cut to aid examination of a section. Our investigations focused on the lower slopes (i.e. below S15) because they were more accessible than the upper parts of sections.

All stone objects, whether flaked or unflaked, that were found embedded in a section were photographed and recorded before removal. Some were found when digging into a section to collect palaeomagnetic samples.

There are five kinds of original horizons bearing stone artefacts:

1. Artefacts found in natural loess/palaeosol sections. Most of the stone artefacts reported in this paper were found embedded firmly in loess/palaeosol sections under a thin weathered crust. Only a small part of stone artefacts (usually less than 3 cm) protruded from the sediment when they were first found. They were then extracted following normal procedures step by step (see e.g. Extended Data Figure 6).

2. Artefacts found in natural loess/palaeosol sections during palaeomagnetic sampling. Several artefacts were found during palaeomagnetic sampling of S22, S23, S24, and S27. Stratigraphic inspection and analysis of palaeomagnetic samples adjacent to and above these artefacts indicate that these artefacts are in undisturbed, *in-situ* deposits. Details are in Extended Data Figure 4c.

3. Artefacts found in the man-made roadside section through S27. These are described in Extended Data Figure 7.

4. Artefacts found in an excavation (Subsection KW) in layers S27 and L28 ~500 m northeast of Subsection IV (see Extended Data Figures 8-10 for details).

5. Artefacts found in slope wash on gentle slopes or at the base of gullies. This slope wash was avoided in our palaeomagnetic sampling. Some stone artefacts (ca 100) were found in slope wash and at the bottom of gullies. They were labeled strictly as "surface" in field records and on the stone surface in order to be distinguished from those found *in situ* in original horizons. None of these stone artefacts are listed in this paper.

Examples of field procedures and their results are shown in the following figures:

Extended Data Figure 4. Landscape in which palaeomagnetic sampling and artefact collecting were carried out at the SC locality.

Extended Data Figure 5. Distribution and linking method of sections at the Shangchen locality.

Extended Data Figure 6. Stone artefacts found during sampling of S22 and S24.

Extended Data Figure 7. Artefact collection at the Shangchen section from S27.

Extended Data Figure 8. The stratigraphic partition, grid lay-out, and distribution of artefacts and fossils at the exploratory trench (Subsection KW) in S27 and L28.

Extended Data Figure 9. The excavation of the exploratory trench (the Subsection KW) in layers

S27 and L28 at Shangchen locality.

Extended Data Figure 10. Selected artefacts and fossils from the exploratory trench (Subsection KW) in S27 and L28.

Supplementary Information Video 1 (SI Video 1) is a video with 3D animation of an artefact (SC2012-0507-3) from S27.

Supplementary Information Video 2 (SI Video 2) is a video with 3D animation of an artefact (SC2012-0507-2) from S27.

Supplementary Information Video 3 (SI Video 3) is a video with 3D animation of an artefact (SC 20120502-6) from S23.

#### IV. Stone artefacts from Shangchen locality

**SI Table 6.** Stone artefacts from Early Pleistocene palaeosol and loess units between S15 and L28 at the Shangchen locality. See S1-1 Table 1 for the age of each loess and palaeosol unit. The artefacts found above S15 are not included in this paper.

| Artefact number        | Layer   | Length (mm) | Width (mm) | Thickness (mm) | Weight (g) | NPF | NSF | ND | Rock type | Artefact type                      |
|------------------------|---------|-------------|------------|----------------|------------|-----|-----|----|-----------|------------------------------------|
| SC081016-3             | S15     | 50.1        | 44.0       | 17.2           | 41         | 3   |     | 2  | quartzite | scraper                            |
| SC 20120504-1          | S16     | 84.2        | 46.3       | 24.4           | 82         | 2   |     | 2  | quartzite | end scraper or notch               |
| SC 20120514            | S16     | 64.1        | 40.8       | 27.8           | 83         | 3   | 3   | 3  | quartzite | scraper; possible notch            |
| SC-A 070915-1          | L17     | 150.5       | 107.2      | 44.2           | 764        | 7   |     | 4  | quartzite | biface or pick                     |
| SC080708-06            | S18     | 82.2        | 70.2       | 49.5           | 216        | 7   |     | 5  | quartzite | core                               |
| SC080708 WS4           | S18     | 57.5        | 43.9       | 16.1           | 48         | 3   |     | 2  | quartzite | flake fragment                     |
| SC-W4-2 0707           | S18     | 66.5        | 35.4       | 23.1           | 55         | NC  |     | NC | quartzite | fragment                           |
| SC 20120502-8          | S18     | 98.7        | 117.8      | 58.1           | 820        | 3   |     | 1  | quartzite | flat core                          |
| SC-W4 0707             | S18     | 30.6        | 24.2       | 14.5           | 12         | NC  |     | NC | quartzite | small fragment                     |
| SC 20120502-11         | S18 top | 62.9        | 50.9       | 22.1           | 78.6       | 2   |     | 2  | quartzite | fragment                           |
| SC-W5-3 0707           | S19     | 80.4        | 43.9       | 40.8           | 106        | 3   |     | 1  | quartzite | core fragment                      |
| SC0709-3 WS5           | S19     | 41.6        | 38.8       | 28.4           | 41         | 3   |     | 1  | quartzite | cortical fragment                  |
| SC0707-W5-1            | S19     | 55.1        | 35.8       | 22.4           | 45         | 4   |     | 2  | quartz    | core fragment                      |
| SC-07-09               | S19     | 75.9        | 55.4       | 42.2           | 285        | 1   |     | 1  | quartzite | flat core; transverse break        |
| SC-E 070918-1 WS4-5    | S19     | 56.9        | 50.3       | 42.1           | 126        | 5   |     | 3  | quartzite | fragment; broken end of large tool |
| SC0709-1 -WS5          | S19     | 109.3       | 86.6       | 46.0           | 655        | N   |     | N  | quartz    | hammerstone                        |
| SC080708-07 WS5        | S19     | 49.6        | 43.5       | 39.4           | 112        | N   |     | N  | quartz    | manuport                           |
| SC0707-W5-2            | S19     | 68.5        | 58.9       | 29.6           | 116        | 10  |     | 2  | quartzite | point                              |
| SC 20120502-12         | S20     | 66.6        | 45.2       | 32.5           | 87         | 3   |     | NC | sandstone | fragment                           |
| SC0709-2 WS6           | S20     | 91.1        | 69.9       | 32.5           | 264        | 2   |     | 1  | quartz    | borer <sup>(1)</sup>               |
| SC W6-2 0707           | S20     | 39.4        | 33.2       | 15.9           | 20         | 2   |     | 1  | quartzite | flake fragment                     |
| SC-E-070918-9          | S20     | 28.2        | 18.2       | 17.5           | 12         | 7   |     | 5  | quartz    | flaking debris                     |
| SC0707-W6-1            | S20     | 126.1       | 109.8      | 77.1           | 1,019      | 3   | 4   | 3  | quartzite | pick                               |
| SCW6-3 0707            | S20     | 44.7        | 26.7       | 11.6           | 14         | 1   |     | 1  | quartzite | scraper (retouch noted)            |
| SC 20120502-10         | L21     | 55.4        | 41.1       | 16.0           | 40.5       | 2   |     | 2  | quartzite | scraper                            |
| SC-E-S 070918-18-5     | S21     | 29.0        | 21.5       | 17.8           | 12         | 3   |     | 3  | quartz    | small fragment; no cortex          |
| SC-E-S 070918-7 WS 6-7 | S21     | 105.6       | 64.9       | 47.2           | 139        | N   |     | N  | quartzite | hammerstone                        |
| SC-E-5 070918-6 WS 6-7 | S21     | 131.0       | 71.2       | 52.6           | 639        | N   |     | N  | quartzite | manuport                           |
| SC-E-S 070918-4 WS1    | S21     | 66.5        | 58.6       | 38.9           | 225        | N   |     | N  | quartz    | manuport                           |
| SC-E 070918-2          | S21     | 38.5        | 30.2       | 9.6            | 13         | 1   | 3   | 2  | quartzite | scraper                            |
| SC 20120503-1          | S21     | 133.8       | 123.0      | 112.7          | 2,060      | 4   | 1   | 3  | quartzite | core                               |

|                   |           |       |       |      |       |   |   |    |             |                                             |
|-------------------|-----------|-------|-------|------|-------|---|---|----|-------------|---------------------------------------------|
| SC-A 070915-2 WS7 | S21       | 33.1  | 42.2  | 11.4 | 19    | 2 |   | 1  | quartzite   | flake                                       |
| SC 20120502-7     | S21 lower | 115.7 | 89.2  | 43.4 | 660   | 1 |   | 1  | quartzite   | flake fragment                              |
| SC 20120502-5     | L22       | 82.2  | 61.9  | 50.2 | 292   | N |   | N  | quartzite   | hammer                                      |
| SC 20120503-11    | L22       | 52.3  | 33.5  | 15.1 | 31    | 1 |   | 1  | quartzite   | notch                                       |
| SC-E-E 070917-12  | S22       | 83.7  | 53.9  | 34.5 | 155   | 8 |   | 3  | quartzite   | biface                                      |
| SC-W8-1 0707      | S22       | 44.9  | 28.4  | 19.0 | 23    | 4 |   | 2  | quartz      | bipolar fragment                            |
| SC 091101-4       | S22       | 64.9  | 51.3  | 22.4 | 86    | 2 |   | 2  | quartzite   | borer <sup>(1)</sup>                        |
| SC080711-8        | S22       | 50.6  | 25.9  | 18.5 | 21    | 4 |   | NC | quartzite   | fragment                                    |
| SC 080708-02      | S22       | 145.4 | 98.8  | 68.7 | 1,219 | 4 | 3 | 5  | quartzite   | core                                        |
| SC080708-03       | S22       | 82.1  | 43.6  | 64.9 | 360   | 4 | 3 | 1  | quartzite   | core                                        |
| SC080711-13       | S22       | 63.9  | 53.5  | 40.3 | 190   | 3 | 4 | 3  | quartzite   | core, no cortex                             |
| SC-E-E 070917-7   | S22       | 74.8  | 55.4  | 48.6 | 348   | 1 | 2 | 2  | quartzite   | core                                        |
| SC080711-6        | S22       | 59.0  | 42.5  | 38.2 | 103   | 1 | 2 | 2  | quartzite   | flake                                       |
| SC-FW 080710-4    | S22       | 49.0  | 35.9  | 13.3 | 24    | 3 |   | 3  | quartz      | flake fragment, no cortex                   |
| SC 20120503-12    | S22       | 44.0  | 38.6  | 15.0 | 40    | 2 |   | 2  | quartzite   | flake fragment; salami slice <sup>(2)</sup> |
| SC 091101-7       | S22       | 76.0  | 49.7  | 32.0 | 122   | 6 |   | 3  | quartzite   | flake tablet                                |
| SC-080711-1       | S22       | 42.0  | 47.7  | 17.4 | 37    | 2 |   | 1  | quartzite   | flake                                       |
| SC 20120502-9     | S22       | 39.8  | 27.7  | 16.8 | 18    | N |   | N  | quartzite   | fragment                                    |
| SC 20100610-S22   | S22       | 58.7  | 58.0  | 60.0 | 277   | N |   | N  | quartzite   | manuport                                    |
| SC080708-01       | S22       | 85.8  | 70.6  | 63.1 | 475   | N |   | N  | quartzite   | hammer <sup>(3)</sup>                       |
| SC 20091101-12    | S22       | 74.4  | 56.4  | 31.3 | 177   | N |   | N  | quartzite   | manuport                                    |
| SC 20091101-5     | S22       | 77.5  | 60.8  | 46.5 | 290   | N |   | N  | sandstone   | manuport                                    |
| SC 20120502-4     | S22       | 103.4 | 96.3  | 46.7 | 880   | N |   | N  | quartzite   | manuport                                    |
| SC080-708-05      | S22       | 70.3  | 59.3  | 19.6 | 110   | 2 |   | 2  | quartzite   | notch                                       |
| SC080711-20       | S22       | 66.9  | 38.1  | 25.1 | 81    | 5 |   | 4  | quartzite   | notch                                       |
| SC-E-E 070917-14  | S22       | 62.7  | 43.5  | 24.1 | 51    | 4 |   | 2  | quartzite   | flake                                       |
| SC 091101-6       | S22       | 72.6  | 58.9  | 19.7 | 103   | 2 |   | 2  | quartzite   | flake                                       |
| SC 20100610-S22-b | S22       | 22.3  | 23.4  | 11.1 | 8     | 1 |   | 1  | quartz      | scraper, bipolar                            |
| SC080708-11       | S22       | 46.4  | 34.0  | 21.5 | 30    | 3 |   | 3  | quartz      | scraper                                     |
| SC080711-6        | S22       | 52.7  | 43.8  | 12.9 | 33    | 3 |   | 3  | quartz      | scraper                                     |
| SC-E-E 070911-1   | S22       | 55.9  | 28.4  | 12.5 | 27    | 1 | 5 | 3  | quartzite   | scraper                                     |
| SC-E-E 070917-6   | S22       | 76.7  | 62.8  | 30.8 | 152   | 1 |   | 1  | quartz      | scraper                                     |
| SC-E-E 070917-9   | S22       | 82.4  | 56.7  | 22.2 | 125   | 4 |   | 2  | metamorphic | scraper                                     |
| SC-FW080710-3     | S22       | 79.0  | 50.6  | 29.5 | 104   | 6 |   | 2  | quartz      | scraper                                     |
| SC-FW 080710-13   | S22       | 58.5  | 57.5  | 39.1 |       | 4 |   | 4  | quartzite   | core                                        |
| SC 20120503-10    | S22       | 65.6  | 37.9  | 17.1 | 61    | 4 |   | 1  | quartzite   | scraper                                     |
| SC 20100610-S22-a | S22       | 21.3  | 17.6  | 8.7  | 4     | 2 |   | 2  | quartz      | scraper; possible notch                     |
| SC070926-1        | S23       | 89.8  | 53.5  | 25.9 | 141   | 4 |   | 3  | quartzite   | flake fragment                              |
| SC 20120502-6     | S23       | 71.3  | 46.5  | 21.1 | 72    | 2 |   | 1  | quartzite   | flake, salami slice <sup>(2)</sup>          |
| SC080710-1        | S24       | 150.3 | 148.8 | 91.7 | 2,841 | 2 |   | 2  | quartzite   | core                                        |
| SC0807 11-01      | S24       | 52.5  | 34.4  | 19.2 | 30    | 2 |   | 1  | quartzite   | flake fragment                              |



|                                  |         |       |       |       |       |    |   |    |                   |                       |
|----------------------------------|---------|-------|-------|-------|-------|----|---|----|-------------------|-----------------------|
| SC080712-1-a                     | S24     | 46.0  | 31.1  | 12.1  | 17    | 1  |   | 1  | quartz            | scraper               |
| SC080712-1-b                     | S24     | 39.0  | 48.2  | 18.3  | 36    | 3  |   | 1  | quartzite         | flake fragment        |
| SCW 9-10                         | S24     | 97.3  | 75.7  | 42.5  | 204   | 3  |   | 2  | quartz porphyrite | notch,                |
| SC080708 L25                     | L25     | 24.3  | 22.6  | 19.7  | 12    | 3  |   | 3  | quartz            | flaking debris        |
| SC2012 0504-2                    | L25     | 94.4  | 67.4  | 42.2  | 380   | N  |   | N  | quartzite         | hammer <sup>(3)</sup> |
| SC-E-S 070918-8                  | L25     | 49.5  | 29.3  | 17.6  | 24    | NC |   | NC | quartzite         | fragment              |
| 2010-06 SC-L25                   | L25     | 62.8  | 62.9  | 33.9  | 156   | 1  | 3 | 2  | quartz            | scraper               |
| SC-D2                            | S26     | 116.4 | 56.8  | 37.1  | 426   | 1  |   | 1  | quartzite         | cobble                |
| SC-D2a                           | L27     | 115.1 | 58.4  | 38.2  |       |    |   |    | quartzite         | cobble                |
| SC-B D2-2                        | L27     | 54.6  | 39.2  | 26.3  | 168   | 4  |   | 4  | quartzite         | bipolar fragment      |
| SC 20120516-1                    | S27     | 62.5  | 47.3  | 49.7  | 241   | 4  |   | 1  | quartz            | core                  |
| SC20120507-1                     | S27     | 152.4 | 145.4 | 82.6  | 1,908 | 4  |   | 1  | quartzite         | core                  |
| X2013 0712-D1                    | S27     | 60.2  | 46.9  | 26.4  | 97    | 2  | 1 | 2  | quartzite         | core/scraper          |
| SC2012-0507-3                    | S27     | 92.0  | 53.0  | 31.8  | 143   | 5  |   | 2  | quartzite         | flake tool            |
| SC 2012 0507-2                   | S27     | 84.8  | 47.8  | 28.0  | 108   | 4  | 1 | 2  | quartzite         | pointed piece         |
| SC 20120518-1                    | S27     | 60.4  | 56.5  | 46.1  | 238   | 1  | ` | 1  | quartzite         | core                  |
| <b>Excavation of S27 and L28</b> |         |       |       |       |       |    |   |    |                   |                       |
| SC-K4                            | S27/L28 | 225.0 | 133.0 | 100.0 | 3,770 | 4  | N | 2  | quartzite         | core                  |
| SC-K5                            | S27/L28 | 56.0  | 36.0  | 15.0  | 35    | 1  | 2 | 2  | quartzite         | flake tool            |
| SC-K30                           | L28     | 85.5  | 77.0  | 38.0  | 205   | 2  |   | 2  | quartzite         | pointed piece         |
| SC-K46                           | L28     | 29.0  | 21.0  | 5.0   | 4.6   | 2  |   | 3  | quartzite         | scraper               |
| SC-K53                           | L28     | 81.2  | 55.0  | 19.0  | 80.8  | 2  |   | 2  | quartzite         | flake                 |
| SC-K54                           | L28     | 34.0  | 29.0  | 9.5   | 8.2   | 2  |   | 2  | quartzite         | scraper               |
| SC-K55                           | L28     | 29.0  | 26.5  | 13.0  | 7.9   | 2  | 1 | 3  | quartzite         | point                 |
| SC-K57                           | L28     | 19.0  | 16.0  | 4.0   | 3.3   | 2  | 2 | 3  | quartz            | scraper               |

### Notes:

For layers, S = palaeosol, and L = loess.

Measurements are in mm for size and g for weight. NPF = number of primary flake removals; NSF = number of secondary flake removals; ND = number of directions of flaking; Columns 7 (NPF) and 9 (ND): NC = not clear; N = none.

(1) Borer is a tool that can make a hole, and can also be called an awl.

(2) Salami flakes are defined by Hurcombe<sup>49</sup>: “They are round, and have a continuous arc or ring of cortex from the platform and extending down around their circumference, with the flake scar from the previous removal forming a neat round dorsal scar. They signify the opening stages of a pebble core reduction strategy by being the second or at most third flake off a cobble, and could either alter the angle of the platform created at the top of a cobble, or widen it to encompass more of the cobble’s breadth”.

(3) Two hammerstones had possible percussion damage on one side.

**SI Table 7.** Details of selected artefacts from L28/S27, S27, L27, L25 and S23 shown in Figure 4 of main text.

| Number in Figure 4 | Specimen number | Layer   | Rock type | Length (mm) | Breadth (mm) | Thickness (mm) | NF | ND | Artefact type    |
|--------------------|-----------------|---------|-----------|-------------|--------------|----------------|----|----|------------------|
| 4a                 | SC 20120507-3   | S27     | quartzite | 92.0        | 53.0         | 31.8           | 7  | 2  | flake tool       |
| 4b                 | SC 20120507-2   | S27     | quartzite | 84.8        | 47.8         | 28.0           | 5  | 2  | pointed piece    |
| 4c                 | SC 20120516-1   | S27     | quartzite | 62.5        | 47.3         | 49.7           | 4  | 1  | core             |
| 4d                 | SC 20120507-1   | S27     | quartzite | 152.4       | 145.4        | 82.6           | 4  | 1  | core             |
| 4e                 | SC-B D2-2       | L27     | quartzite | 54.6        | 39.2         | 26.3           | 4  | 2  | bipolar fragment |
| 4f                 | SC 20120502-6   | S23     | quartzite | 71.3        | 46.5         | 21.1           | 2  | 1  | flake            |
| 4g                 | 2010-06 SC      | L25     | quartz    | 62.8        | 62.9         | 33.9           | 4  | 2  | scraper          |
| 4h                 | SC-K5           | S27/L28 | quartzite | 56.0        | 36.0         | 15.0           | 3  | 2  | flake tool       |
| 4i                 | SC-K4           | S27/L28 | quartzite | 225.0       | 133.0        | 100.0          | 4  | 2  | core             |
| 4j                 | SC070926-1      | S23     | quartzite | 89.8        | 53.5         | 25.9           | 5  | 4  | flake fragment   |

**Notes:**

Measurements are in mm. NF: number of flake removals; ND: number of directions of flake removals.

4a) SC 2012-0507-3 (S27): There are four primary and three secondary flake removals from two directions. Two of the flake removals are 61.3 x 3 and 41.0 x 22.7 mm; the others are less clear. Percussion was bipolar. The piece is fresh, and one edge is sharp. The cortex on the base is 37.7 x 27.8 mm. See also Extended Data Figure 7 for photographs of its extraction from the section.

4b) SC 2012 0507-2 (S27): There are four primary flake removals and one secondary one at the base. Two primary removals with clear edges of 80.6 x 34.6 and 25.9 x 23.7 mm. Percussion was bipolar, and the edges are sharp. The cortex on the base is 35.5 x 25.1mm.

4c) SC 20120516-1 (S27). The piece is fresh and there are four flake removals, 40.2 x 36.7; 41.7 x 36.7; 44.8 x 18.3; and 23.3 x 21.7 mm. Percussions were by hard hammer.

4d) SC 20120507-1 (S27) The flake removal scars are clear and 61.3 x 77.9; 76.3 x 41.1; 64.9 x 56.4; and 41.4 x 29.5 mm. Flaking angles were c. 80°. See Extended Data Figure 7 for photographs of its extraction from the section.

4e) SC-B D2-2 (L27). There are four primary flake removals, and two secondary ones. Flaking was bipolar, and the piece was fresh.

4f) SC 20120502-6 (S23). This piece is a thin slice that was struck from the face of a flat core. There is a clear flake removal across the ventral face,

and a hinge fracture on the dorsal face. Cortex remains along the outer edge; the opposing edge is sharp. The piece is fresh.

4g) 2010-06 SC (L25). The piece is fresh, with one sharp edge. Two secondary removals are 21.3 x 12.1 and 22.8 x 19.9 mm. Percussion was by hard hammer.

4h) SCK-5 (S27/L28): The piece is fresh and with one twisted edge. There are three secondary flake removals on this edge. See Extended Data Figure 10d for a photograph.

4i) SCK-4 (S27/L28): There are four flake removals from two directions. The flake removal scars on this core are clear and measured 102.5 x 45.4; 84.5 x 53.6; 80.1 x 46.5; and 73.4 x 58.5 mm. See Extended Data Figure 10a for a photograph.

4j) SC070926-1 (S23): There are four primary and one secondary flake removals, from four directions. Two of the flake removals measured 35.0 x 32.8 and 28.8 x 28.7 mm. This is probably a fragment of a larger flake. There is cortex on the dorsal face, but not on the other two.

**SI Table 8.** Details of selected artefacts found in S22

| Number | Specimen number  | Rock type | Length (mm) | Breadth (mm) | Thickness (mm) | NF | ND | Artefact type    |
|--------|------------------|-----------|-------------|--------------|----------------|----|----|------------------|
| a      | SC-E-E 070917-14 | quartzite | 42.7        | 62.5         | 24.1           | 4  | 2  | flake            |
| b      | SC-080711-1      | quartzite | 42.0        | 47.7         | 17.4           | 2  | 1  | flake            |
| c      | SC080711-6-a     | quartz    | 52.7        | 43.8         | 12.9           | 3  | 2  | scraper          |
| d      | SC-FW080710-3    | quartz    | 79.0        | 50.6         | 29.5           | 6  | 2  | scraper          |
| e      | SC-W8-1 0707     | quartz    | 44.9        | 28.4         | 19.0           | 4  | 2  | bipolar fragment |
| f      | SC080711-20      | quartzite | 66.9        | 38.1         | 25.0           | 7  | 4  | notch            |
| g      | SC-E-E 070917-6  | quartz    | 76.7        | 62.8         | 30.8           | 1  | 1  | scraper          |

**Notes:**

Measurements are in mm. NF: number of flake removals; ND: number of directions of flake removals.

a) SC-E-E 070917-14. A flake with cortex on one face and three flake removals on the dorsal side 26.3 x 27.4, 23.6 x 26.2, and 28.8 x 28.2 mm. The cortex measured 42.7 x 23.2 mm, and 15.1 x 14.8 mm on the platform.

b) SC-080711-1. A broken flake with a small area of cortex on the platform at the tip 15.3 x 8.9 mm.

- c) SC080711-6-a. A flake with three flake removals; two were 47.8 x 27.8 and 36.9 x 12.7mm. There is possible edge damage along the basal side. There is some cortex (8.2 x 7.6 mm) on the platform, and some (36.4 x 20.2 mm) on the dorsal side
- d) SC-FW080710-3. A pointed piece that had been flaked extensively, with five flake removals on one face and one on the other, and only a small area of cortex c. 20 x 12 mm. The upper edge has some damage that may indicate use as a scraper.
- e) SC-W8-1 0707. A fragment resulting from bipolar flaking. There are four flake removals from two opposite directions. Three of the removals measured 30.6 x 16.7, 19.9 x 15.7, and 13.5 x 13.4 mm. The break occurred after extraction from the section.
- f) SC080711-20. There were five primary flake removals around the edge, and a secondary one on the obverse. One flake removal 11.1 x 15.0 resulted in a notch, 5.7 mm deep. The obverse side is cortex.
- g) SC-E-E 070917-6. This piece is classed as a scraper because of the fine alternate retouching on the tip, shown in the enlarged view. The retouch is 13.3 mm deep.

## SI References

33. Liu, T. S. *et al.* *Material Composition and Structure of Loess*. Science Press, Beijing (1966).
34. Zhu, Z. Y. & Ding, Z. L. *The Climatic and Neotectonic Evolution in the Loess Plateau of China during the Quaternary*. Geological Publishing House, Beijing (1994).
35. An, Z., Kukla, G. J., Porter, S. C. & Xiao, J. Magnetic susceptibility evidence of monsoon variation on the Loess Plateau of central China during the last 130,000 years. *Quaternary Research* **36**, 29-36 (1991).
36. Deng, C. L., Zhu, R. X., Jackson, M. J., Verosub, K. L. & Singer, M. J. Variability of the temperature-dependent susceptibility of the Holocene eolian deposits in the Chinese loess plateau: a pedogenesis indicator. *Physics and Chemistry of the Earth, Part A: Solid Earth and Geodesy* **26**, 873-878 (2001).
37. Liu, Q. *et al.* An integrated study of the grain-size-dependent magnetic mineralogy of the Chinese loess/paleosol and its environmental significance. *Journal of Geophysical Research* **108**, B9, doi: 10.1029/2002JB002264 (2003).
38. Roberts, A. P., Cui, Y. & Verosub, K. L. Wasp-waisted hysteresis loops: mineral magnetic characteristics and discrimination of components in mixed magnetic systems. *Journal of Geophysical Research* **100**, 17909-17924 (1995).
39. Tauxe, L., Mullender T. A. T. & Pick, T. Potbellies, wasp-waists, and superparamagnetism in magnetic hysteresis. *Journal of Geophysical Research* **101**, 571-585 (1996).
40. Florindo, F. *et al.* Magnetic proxy climate results from the Duanjiapo loess section, southernmost extremity of the Chinese loess plateau. *Journal of Geophysical Research* **104**, 645-659 (1999).
41. Zhu, R., Laj, C. & Mazaud, A. The Matuyama-Brunhes and upper Jaramillo transitions recorded in a loess section at Weinan, north-central China. *Earth and Planetary Science Letters* **125**, 143-158 (1994).
42. Deng, C., Shaw, J., Liu, Q., Pan, Y. & Zhu, R. Mineral magnetic variation of the Jingbian loess/paleosol sequence in the northern Loess Plateau of China: implications for Quaternary development of Asian aridification and cooling. *Earth and Planetary Science Letters* **241**, 248-259, doi:http://dx.doi.org/10.1016/j.epsl.2005.10.020 (2006).
43. Jin, C. & Liu, Q. Reliability of the natural remanent magnetization recorded in Chinese loess. *Journal of Geophysical Research* **115**, B4, doi: 10.1029/2009JB006703 (2010).

44. Jelinek, V. Statistical processing of anisotropy of magnetic susceptibility measured on groups of specimens. *Studia Geophysica et Geodaetica* **22**, 50-62 (1978).
45. Kirschvink, J. L. The least-squares line and plane and the analysis of palaeomagnetic data. *Geophysical Journal of the Royal Astronomical Society* **62**, 699-718 (1980).
46. Heslop, D. & Roberts, A. P. Analyzing paleomagnetic data: to anchor or not to anchor? *Journal of Geophysical Research Solid Earth* **121**, 7742-7753 (2016).
47. Fisher, R. A. Dispersion on a sphere. *Proceedings of the Royal Society of London A* **217**, 295-305 (1953).
48. McFadden, P. L. & McElhinny, M. W. Classification of the reversal test in palaeomagnetism. *Geophysical Journal International* **103**, 725-729 (1990).
49. Hurcombe, H. The lithic evidence from the Pabbi Hills. In: *Early Hominin Landscapes in Northern Pakistan* (ed. R. Dennell). British Archaeological Reports International Series **1265**, 222-292 (2004).
